# Supplementary material for: Retinoic acid‐loading of the major birch pollen allergen Bet v 1 may improve specific allergen immunotherapy: In silico, in vitro and in vivo data in BALB/c mice
Source: PubMed Central journal article supplement (PMC7522679; doi:10.1111/all.14259), 2020-04-16

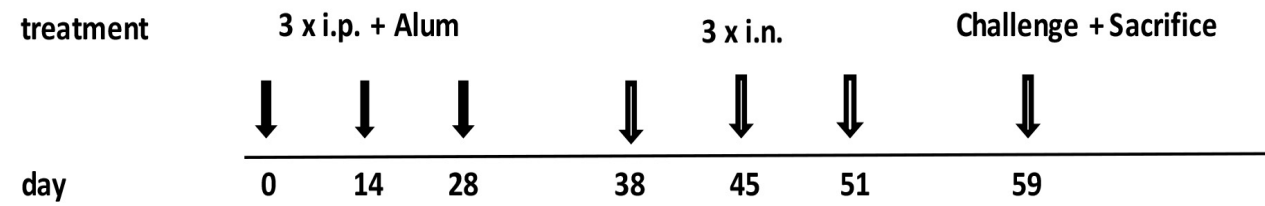

Supplement: ALL-75-2073-s005.pdf [file ALL-75-2073-s005.pdf]
